# Supplementary material for: Substrate Specificity of Cysteine Proteases Beyond the S2 Pocket: Mutagenesis and Molecular Dynamics Investigation of Fasciola hepatica Cathepsins L
Source: PubMed Central journal article supplement (PMC5917446; doi:10.3389/fmolb.2018.00040), 2018-04-19

**Supplementary Table 2. *Fh*CL1 hydrolysis of Z-Val-Leu-Lys-AMC peptide substrate, data fit to the Michelis-Menten equation.** The table in the second page shows the substrate concentration (X) and initial velocity values (Y, measured in  $\mu\text{M}$  AMC released per second), used to determine the  $K_M$  and  $V_{\max}$  parameters for the hydrolysis of Z-Val-Leu-Lys-AMC by *Fh*CL1 (enzyme concentration is 3.17 nM). The third page shows the estimated parameters  $K_M$  and  $V_{\max}$  with the standard errors and the statistics of the data fit calculated by the OriginPro 6.1 software. In the last page the graph of initial velocity vs substrate concentration is showing the data points fitting to the Michaelis Menten equation.

|           | A(X)      | B(Y)    |
|-----------|-----------|---------|
| Long Name | Substrate | Vi      |
| Units     | uM        | uM/s    |
| Comments  | VLK       | AMC/s   |
| 1         | 1         | 0,00191 |
| 2         | 2,5       | 0,00232 |
| 3         | 5         | 0,00361 |
| 4         | 7,5       | 0,00461 |
| 5         | 10        | 0,00599 |
| 6         | 15        | 0,00626 |
| 7         | 20        | 0,0063  |
| 8         | 30        | 0,0065  |
| 9         | 40        | 0,007   |
| 10        | 60        | 0,0069  |
| 11        | 120       | 0,0068  |
| 12        | 200       | 0,0069  |

**Input Data**

|   | Dep/Indep | Data             | Range    | Weight Type  |
|---|-----------|------------------|----------|--------------|
| x | Indep     | [Book1]Sheet1!Su | [1*:12*] |              |
| y | Dep       | [Book1]Sheet1!Vi | [1*:12*] | No Weighting |

**Parameters**

|   |      | Value   | Standard Error |
|---|------|---------|----------------|
| B | Vmax | 0,00737 | 2,28984E-4     |
|   | Km   | 3,93734 | 0,5961         |

Iterations Performed = 3  
 Total Iterations in Session = 3  
 Fit converged - Chi-sqr no longer changed.

**Statistics**

|                         | Vi             |
|-------------------------|----------------|
| Number of Points        | 12             |
| Degrees of Freedom      | 10             |
| Reduced Chi-Sqr         | 1,7776E-7      |
| Residual Sum of Squares | 1,7776E-6      |
| Adj. R-Square           | 0,94802        |
| Fit Status              | Succeeded(101) |

Fit Status Code :  
 101 : Fit converged

**Summary**

|   | Vmax    |            | Km      |        | Statistics      |               |
|---|---------|------------|---------|--------|-----------------|---------------|
|   | Value   | Error      | Value   | Error  | Reduced Chi-Sqr | Adj. R-Square |
| B | 0,00737 | 2,28984E-4 | 3,93734 | 0,5961 | 1,7776E-7       | 0,94802       |

**ANOVA**

|    |                   | DF | Sum of Squares | Mean Square | F Value    | Prob>F      |
|----|-------------------|----|----------------|-------------|------------|-------------|
| Vi | Regression        | 2  | 3,89005E-4     | 1,94502E-4  | 1094,18826 | 1,50497E-11 |
|    | Residual          | 10 | 1,7776E-6      | 1,7776E-7   |            |             |
|    | Uncorrected Total | 12 | 3,90782E-4     |             |            |             |
|    | Corrected Total   | 11 | 3,76149E-5     |             |            |             |

**Fitted Curves Plot**

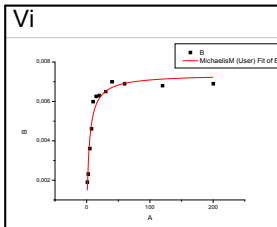

**Residual vs. Independent Plot**

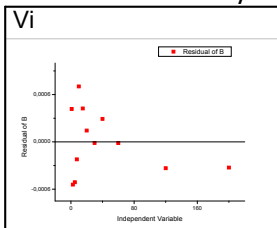

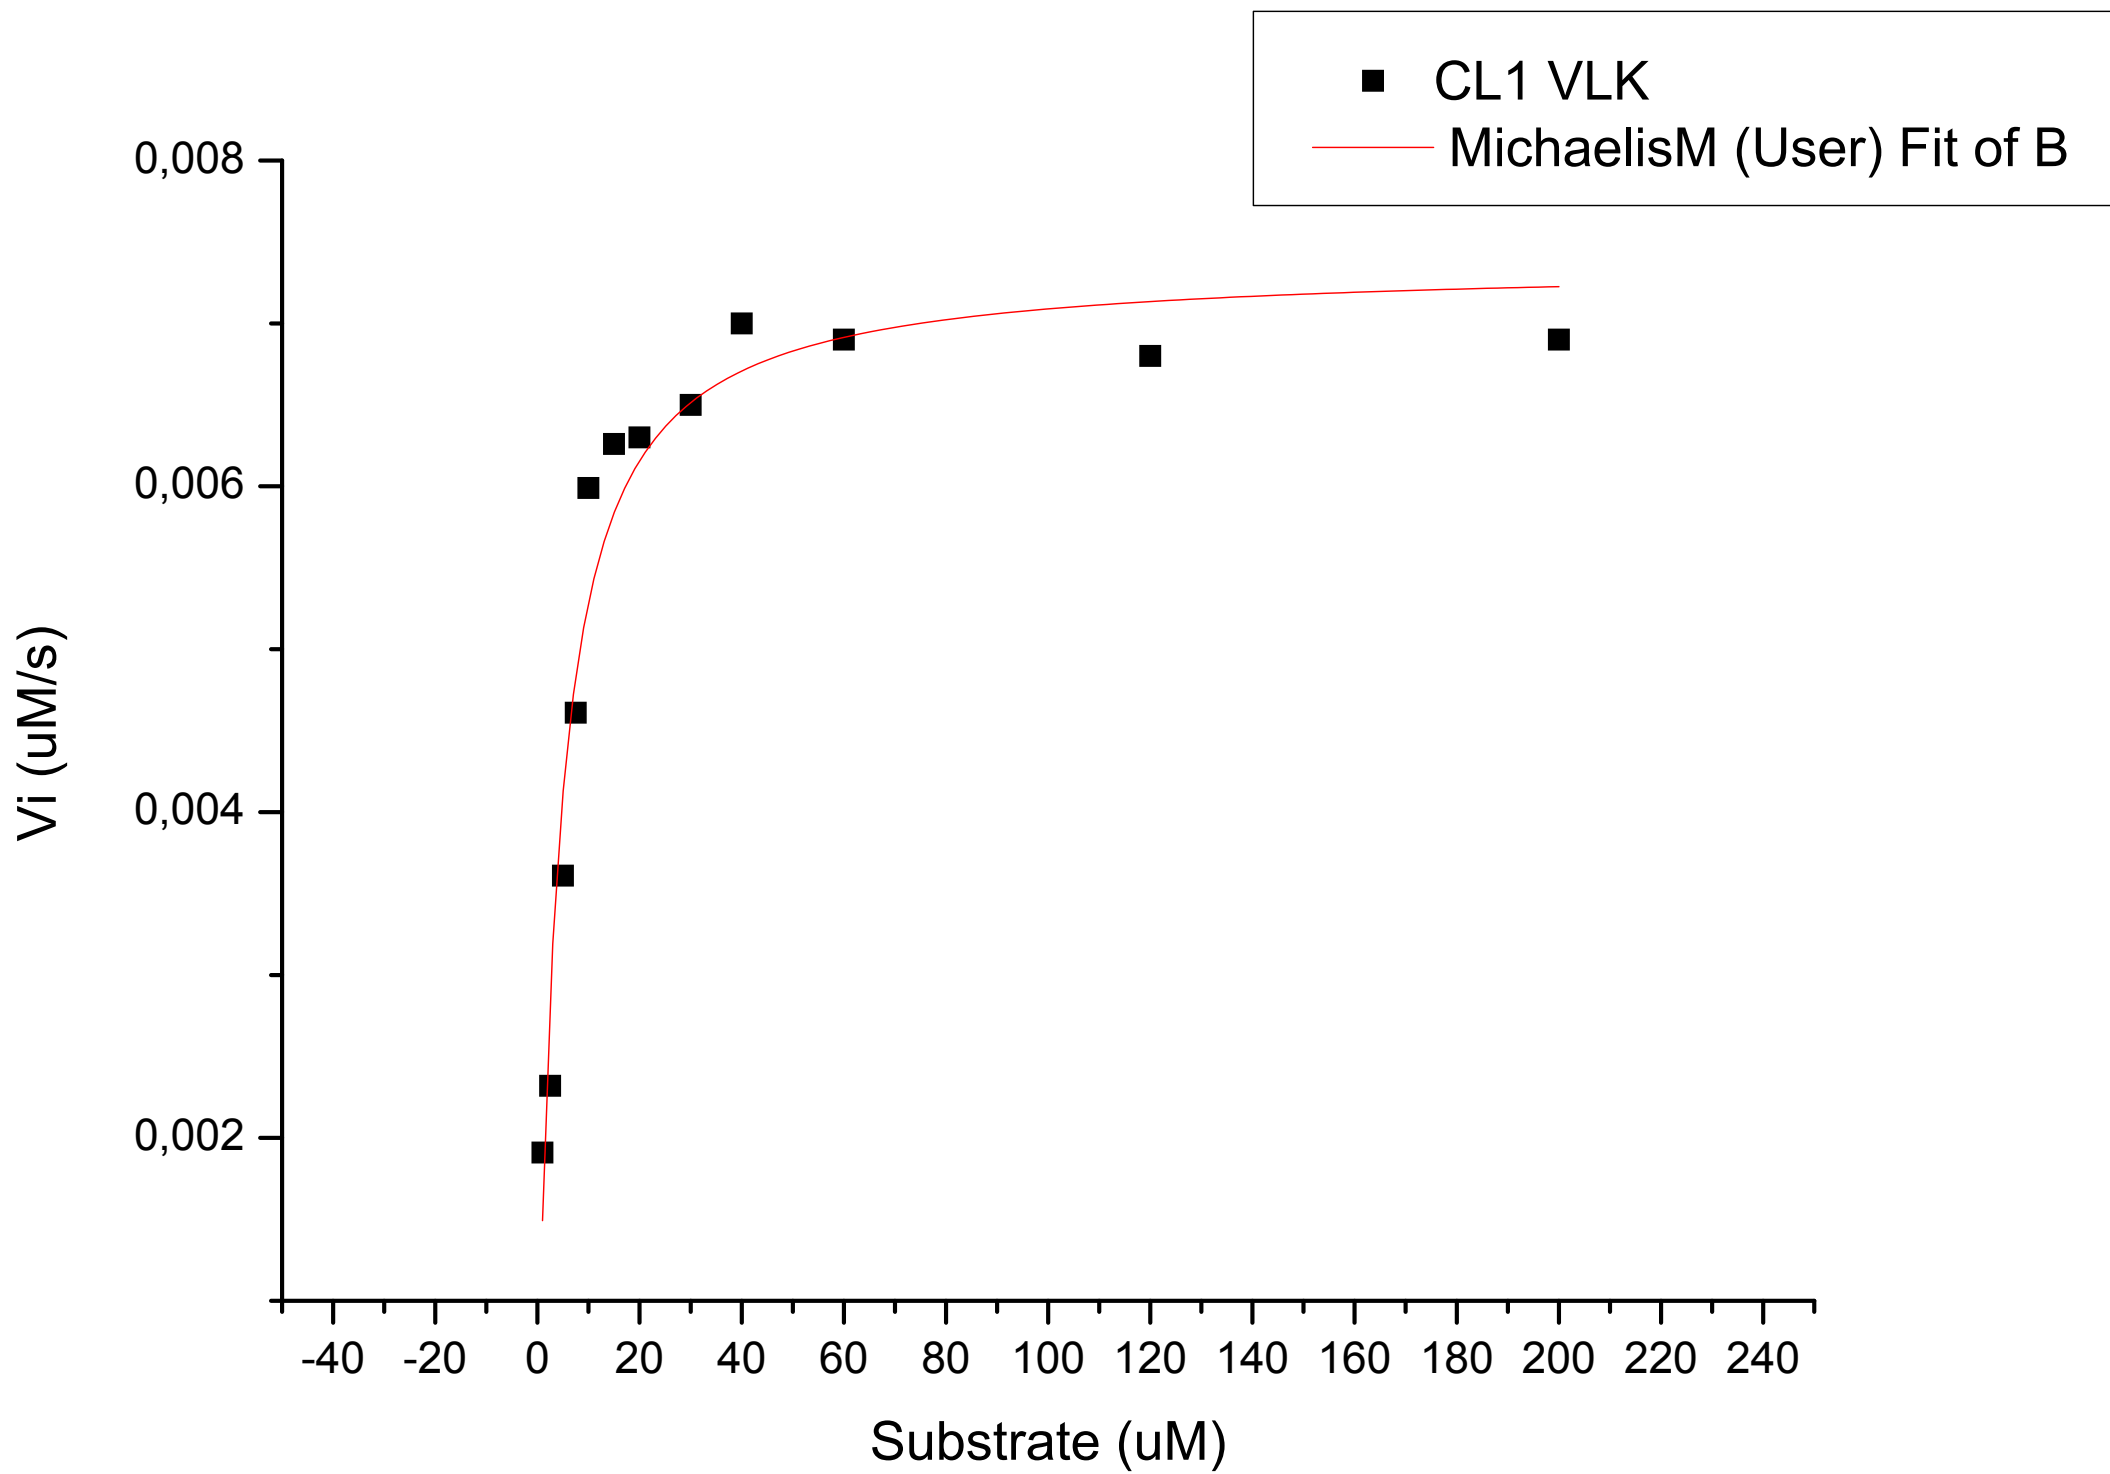

Supplement: Table2.pdf [file Table2.pdf]
